# Supplementary material for: A Sialic Acid-Binding Protein SABP1 of Toxoplasma gondii Mediates Host Cell Attachment and Invasion
Source: Oxford University Press journal article supplement (doi:10.1093/infdis/jiaa072), 2020-02-13
Supplement: jiaa072_suppl_supplementary_table_s1.docx [file jiaa072_suppl_supplementary_table_s1.docx]

Table S1: Primers used in this study:

| Primers | Sequence (5'-3') | Used for |
| --- | --- | --- |
| SABP1_primer F | ATGTCTGGCAACAACCCGT | To amplify coding sequence of SABP1 |
| SABP1_primer R | TCACTTCTTAGCTGGGACAAAG |
| RH, KO-PCR1 F | GACGGCATTCAAAGATTACAG | To examine the integration at 5'-UTR of SABP1 locus |
| RH, KO-PCR1 R | GTCGTGGATTTACCAGTCATG |
| RH, KO-PCR2 F | CACACAGTCTCACCTCGCCT | To examine the integration at 3'-UTR of SABP1 locus |
| RH, KO-PCR2 R | TGCTGAACGGCTCTGTGTG |
| RH, KO-PCR3 F | ATGTCTGGCAACAACCCGT | To check if genomic sequence of SABP1 was deleted by DHFR |
| RH, KO-PCR3 R | TCACTTCTTAGCTGGGACAAAG |
| KO, C-PCR4 F | CTTGTCCCTGGGTGTTTC | To test the integration at 5'-UTR of UPRT locus |
| KO, C-PCR4 R | CCTGTTCTGCGATGAGC |
| KO, C-PCR5 F | TGAGTTGTTCCGCTGTG | To test the integration at 3'-UTR of UPRT locus |
| KO, C-PCR5 R | GTCTCCGGTGGAATGAA |
| KO, C-PCR6 F | CATCATCACGAGGTAATCC | To check if genomic sequence of UPRT was replaced by SABP1 |
| KO, C-PCR6 R | GCAGTCGCACAGAAACAT |
| KO, C-PCR7 F | GGCAAAATGTCTGGCAACAACCCG | To check if coding sequence of SABP1 was inserted at UPRT locus |
| KO, C-PCR7 R | CTTCTTAGCTGGGACAAAGCT |
